# Supplementary material for: Cold Atmospheric Plasma Suppressed MM In Vivo Engraftment by Increasing ROS and Inhibiting the Notch Signaling Pathway
Source: MDPI journal article supplement (doi:10.3390/molecules27185832), 2022-09-08
Supplement: s1 [file s1]

## Supplementary Figure S1

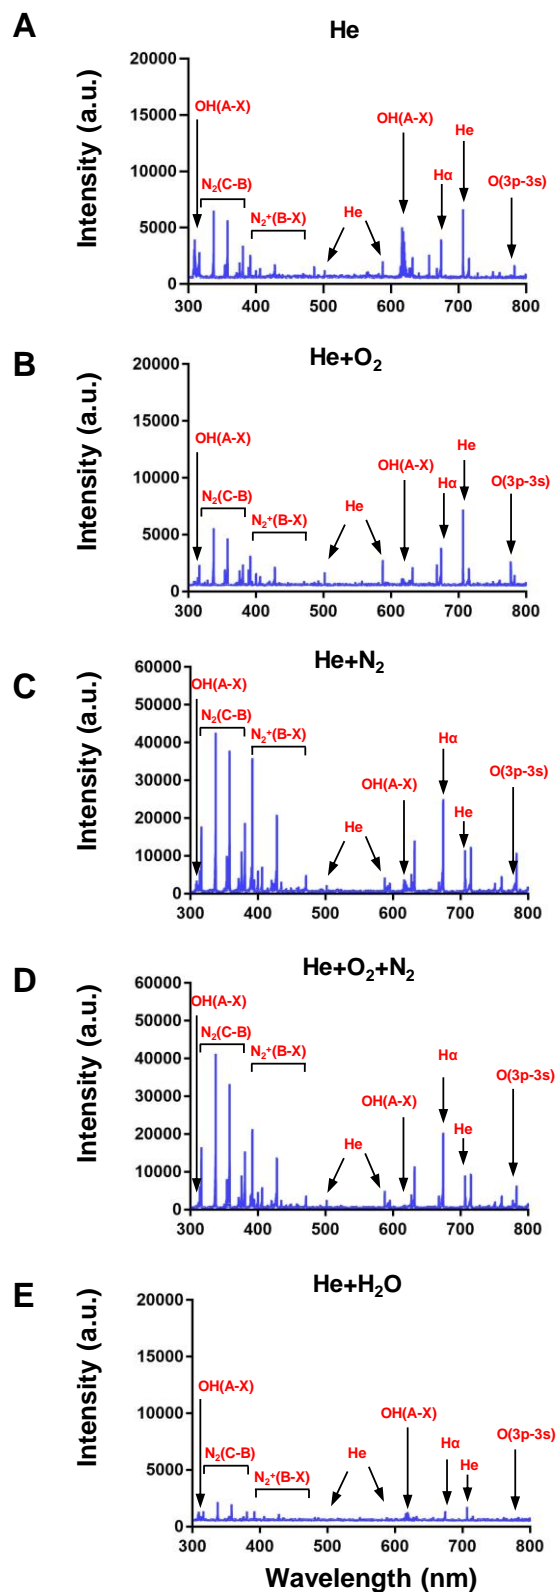

Supplementary Figure S1. The optical emission spectrum of (A) He, (B) He + O<sub>2</sub> (0.5%), (C) He + N<sub>2</sub> (0.5%), (D) He + O<sub>2</sub> (0.5%) + N<sub>2</sub> (0.5%) and (E) He + H<sub>2</sub>O (1%) plasma.
